# Supplementary material
Source: Elsevier journal article supplement (https://www.sciencedirect.com/science/article/pii/S0025775321006497)
Supplement: mmc1 [file S0025775321006497:mmc1.doc]

Anexo 1

| Provincias costeras (n=24) | | Provincias de interior (n=28) | |
| --- | --- | --- | --- |
| Islas Baleares  A Coruña  Las Palmas  Santa Cruz de Tenerife  Asturias  Pontevedra  Cádiz  Cantabria  Tarragona  Murcia  Girona  Almería | Alicante  Málaga  Barcelona Vizcaya  Lugo  Castellón  Valencia  Huelva  Guipúzcoa  Granada  Ceuta  Melilla | Madrid  Sevilla  Zaragoza  Córdoba  Segovia  Soria  La Rioja  Ciudad Real  Cuenca  Ávila  Álava  Salamanca  Albacete  Valladolid | Navarra  Guadalajara  Toledo  Palencia  León  Burgos  Ourense  Cáceres  Lleida  Zamora  Teruel  Huesca  Jaén  Badajoz |
